# Supplementary material for: Impact of meteorological factors on the incidence of childhood hand, foot, and mouth disease (HFMD) analyzed by DLNMs-based time series approach
Source: PubMed Central journal article supplement (PMC5796399; doi:10.1186/s40249-018-0388-5), 2018-01-31
Supplement: 40249_2018_388_MOESM2_ESM.pdf [file 40249_2018_388_MOESM2_ESM.pdf]

Table 1. The comparison of model fit statistics among different lag ranges.

| Candidates of lag ranges | AIC      |
|--------------------------|----------|
| 0-14 days                | 163901.5 |
| 1-14 days                | 156525.7 |
| 2-14 days                | 152358.9 |
| 3-14 days                | 173325.4 |
| 4-14 days                | 150978.8 |
