# Supplementary material for: Impact of meteorological factors on the incidence of childhood hand, foot, and mouth disease (HFMD) analyzed by DLNMs-based time series approach
Source: PubMed Central journal article supplement (PMC5796399; doi:10.1186/s40249-018-0388-5), 2018-01-31
Supplement: 40249_2018_388_MOESM3_ESM.pdf [file 40249_2018_388_MOESM3_ESM.pdf]

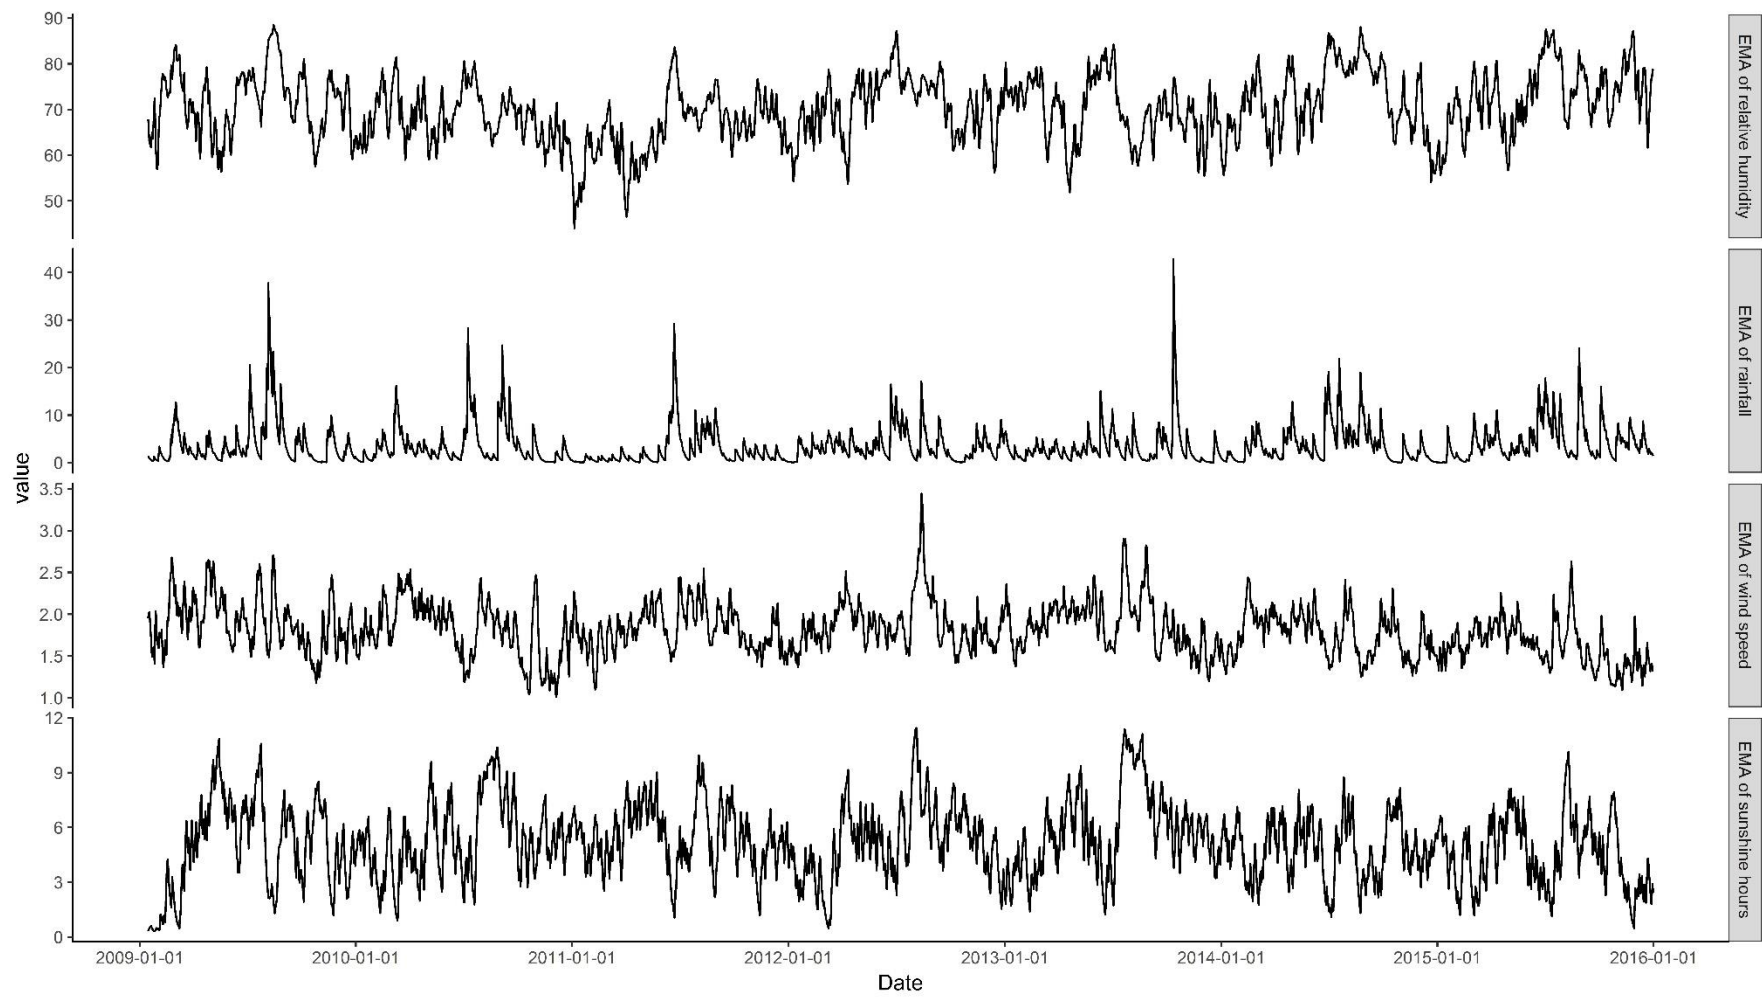

Figure 1. The time series of EMAs for four meteorological variables.
