# Supplementary material for: Impact of meteorological factors on the incidence of childhood hand, foot, and mouth disease (HFMD) analyzed by DLNMs-based time series approach
Source: PubMed Central journal article supplement (PMC5796399; doi:10.1186/s40249-018-0388-5), 2018-01-31
Supplement: 40249_2018_388_MOESM4_ESM.pdf [file 40249_2018_388_MOESM4_ESM.pdf]

Table 1. The estimation of natural spline for time, indicator variables of weekdays and holiday.

| Variables              |    | Estimate | Standard error | RR       | 95% CI             |
|------------------------|----|----------|----------------|----------|--------------------|
| Natural spline of time | 1  | 3.6711   | 0.2524         | 39.2951  | (23.9602,64.4445)  |
| Natural spline of time | 2  | 2.19     | 0.3573         | 8.9352   | (4.4357,17.9989)   |
| Natural spline of time | 3  | 3.3019   | 0.3198         | 27.1642  | (14.5137,50.8412)  |
| Natural spline of time | 4  | 0.8439   | 0.3403         | 2.3254   | (1.1935,4.5308)    |
| Natural spline of time | 5  | 2.6969   | 0.3276         | 14.8337  | (7.8053,28.1908)   |
| Natural spline of time | 6  | 3.1376   | 0.3105         | 23.0485  | (12.5412,42.359)   |
| Natural spline of time | 7  | 2.8963   | 0.2955         | 18.107   | (10.1464,32.3133)  |
| Natural spline of time | 8  | 1.5684   | 0.304          | 4.799    | (2.6447,8.708)     |
| Natural spline of time | 9  | 4.7107   | 0.3027         | 111.1299 | (61.3999,201.1382) |
| Natural spline of time | 10 | 3.724    | 0.3244         | 41.4298  | (21.937,78.2434)   |
| Natural spline of time | 11 | 3.6345   | 0.3246         | 37.8829  | (20.0511,71.5729)  |
| Natural spline of time | 12 | 1.4621   | 0.3541         | 4.315    | (2.1556,8.6377)    |
| Natural spline of time | 13 | 1.6811   | 0.3246         | 5.3715   | (2.8431,10.1484)   |
| Natural spline of time | 14 | 2.959    | 0.3217         | 19.2787  | (10.2622,36.2171)  |
| Natural spline of time | 15 | 2.146    | 0.3044         | 8.5506   | (4.7085,15.5277)   |
| Natural spline of time | 16 | -0.312   | 0.3084         | 0.732    | (0.3999,1.3397)    |
| Natural spline of time | 17 | 3.3165   | 0.309          | 27.5637  | (15.0422,50.5084)  |
| Natural spline of time | 18 | 2.7137   | 0.3257         | 15.085   | (7.9672,28.5619)   |
| Natural spline of time | 19 | 3.0429   | 0.3244         | 20.966   | (11.1015,39.5958)  |
| Natural spline of time | 20 | 1.3308   | 0.3414         | 3.7841   | (1.938,7.3886)     |
| Natural spline of time | 21 | 1.502    | 0.3186         | 4.4907   | (2.405,8.3851)     |
| Natural spline of time | 22 | 4.5499   | 0.3074         | 94.6229  | (51.8003,172.8465) |

|                        |    |        |        |          |                    |
|------------------------|----|--------|--------|----------|--------------------|
| Natural spline of time | 23 | 0.9473 | 0.3016 | 2.5787   | (1.4278,4.6573)    |
| Natural spline of time | 24 | 2.6209 | 0.3018 | 13.7481  | (7.6093,24.8393)   |
| Natural spline of time | 25 | 3.4049 | 0.3074 | 30.1113  | (16.4841,55.0039)  |
| Natural spline of time | 26 | 3.4164 | 0.3255 | 30.4596  | (16.0936,57.6494)  |
| Natural spline of time | 27 | 3.1406 | 0.3262 | 23.1177  | (12.1977,43.8139)  |
| Natural spline of time | 28 | 0.3276 | 0.3442 | 1.3876   | (0.7068,2.7244)    |
| Natural spline of time | 29 | 2.5709 | 0.3322 | 13.0776  | (6.8195,25.0785)   |
| Natural spline of time | 30 | 2.5776 | 0.314  | 13.1655  | (7.1147,24.3624)   |
| Natural spline of time | 31 | 3.5479 | 0.3009 | 34.7403  | (19.262,62.6563)   |
| Natural spline of time | 32 | 0.5238 | 0.3049 | 1.6884   | (0.9289,3.0692)    |
| Natural spline of time | 33 | 4.2314 | 0.3065 | 68.8135  | (37.7377,125.4792) |
| Natural spline of time | 34 | 1.5751 | 0.3199 | 4.8312   | (2.5808,9.044)     |
| Natural spline of time | 35 | 4.0173 | 0.3291 | 55.5509  | (29.1444,105.8831) |
| Natural spline of time | 36 | 1.0441 | 0.3464 | 2.8408   | (1.4407,5.6016)    |
| Natural spline of time | 37 | 2.6855 | 0.3389 | 14.6655  | (7.5478,28.4954)   |
| Natural spline of time | 38 | 2.8522 | 0.3086 | 17.3259  | (9.4626,31.7234)   |
| Natural spline of time | 39 | 2.2259 | 0.3039 | 9.2618   | (5.1052,16.8028)   |
| Natural spline of time | 40 | 0.4106 | 0.3035 | 1.5077   | (0.8317,2.7332)    |
| Natural spline of time | 41 | 4.7541 | 0.3055 | 116.0592 | (63.7724,211.2157) |
| Natural spline of time | 42 | 2.8222 | 0.312  | 16.8138  | (9.1219,30.9917)   |
| Natural spline of time | 43 | 3.6523 | 0.3308 | 38.5633  | (20.1647,73.749)   |
| Natural spline of time | 44 | 1.4112 | 0.3317 | 4.1009   | (2.1406,7.8564)    |
| Natural spline of time | 45 | 3.512  | 0.3341 | 33.5152  | (17.4121,64.511)   |
| Natural spline of time | 46 | 2.5164 | 0.3071 | 12.3839  | (6.7834,22.6083)   |

|                        |    |         |        |         |                   |
|------------------------|----|---------|--------|---------|-------------------|
| Natural spline of time | 47 | 3.2218  | 0.3046 | 25.0732 | (13.8016,45.5502) |
| Natural spline of time | 48 | -0.8065 | 0.3064 | 0.4464  | (0.2449,0.8139)   |
| Natural spline of time | 49 | 3.4308  | 0.307  | 30.9014 | (16.9299,56.4029) |
| Natural spline of time | 50 | 2.648   | 0.3177 | 14.1258 | (7.5784,26.3296)  |
| Natural spline of time | 51 | 3.0508  | 0.3263 | 21.1322 | (11.1479,40.0588) |
| Natural spline of time | 52 | 1.9931  | 0.337  | 7.3382  | (3.7908,14.2054)  |
| Natural spline of time | 53 | 1.587   | 0.3351 | 4.8891  | (2.535,9.4291)    |
| Natural spline of time | 54 | 2.6923  | 0.2173 | 14.7656 | (9.6445,22.6058)  |
| Natural spline of time | 55 | 3.3912  | 0.6203 | 29.7016 | (8.8058,100.1819) |
| Natural spline of time | 56 | 1.599   | 0.136  | 4.9481  | (3.7903,6.4596)   |
| Monday                 |    | 0.1205  | 0.0273 | 1.1281  | (1.0693,1.1901)   |
| Tuesday                |    | 0.0149  | 0.0274 | 1.015   | (0.9619,1.071)    |
| Wednesday              |    | 0.0028  | 0.0274 | 1.0028  | (0.9504,1.0581)   |
| Thursday               |    | -0.0784 | 0.0274 | 0.9246  | (0.8762,0.9756)   |
| Friday                 |    | -0.0354 | 0.0274 | 0.9652  | (0.9148,1.0185)   |
| Saturday               |    | -0.0159 | 0.0274 | 0.9842  | (0.9328,1.0385)   |
| Public holiday         |    | -0.2378 | 0.0235 | 0.7884  | (0.7529,0.8255)   |

1. The natural spline for time has 8 degrees of freedom per year, so there are 56 estimates of the natural spline for time in the table.
2. Sunday was used as the reference during the estimation of weekday covariate.
3. Non-holiday was used as the reference during the estimation of holiday covariate.
